# Supplementary material for: Phase Ib study of patients with metastatic castrate-resistant prostate cancer treated with different sequencing regimens of atezolizumab and sipuleucel-T
Source: PubMed Central journal article supplement — J Immunother Cancer. 2021 Aug 10;9(8):e002931. doi: 10.1136/jitc-2021-002931 (PMC8356194; doi:10.1136/jitc-2021-002931), 2021-08-10
Supplement: jitc-2021-002931supp002.pdf [file jitc-2021-002931supp002.pdf]

**Table S1. Immune correlates. IgM and IgG immunoglobulins directed toward prostatic acid phosphatase (PAP) or PA2024 were measured at various time points.**

| Arm   | Responder or Non-responder |        | week 0 | week 12 | week 16 | week 20 | week 32 |
|-------|----------------------------|--------|--------|---------|---------|---------|---------|
| Arm 1 | Responder                  | PAP    | 800    | 1600    | 102400  | 25600   | 1600    |
| Arm 1 | Responder                  | PAP    | 50     | 409600  | 25600   | 400     | 3200    |
| Arm 1 | Responder                  | PAP    | 1600   | 3200    | 204800  | 6400    | 12800   |
| Arm 1 | Responder                  | PAP    | 1600   | 409600  | 25600   | 204800  |         |
| Arm 1 | Responder                  | PAP    | 3200   | 102400  |         |         |         |
| Arm 1 | Responder                  | PAP    | 12800  | 204800  |         |         |         |
| Arm 1 | Non-responder              | PAP    | 3200   | 12800   | 51200   | 3200    |         |
| Arm 1 | Non-responder              | PAP    | 400    | 204800  | 6400    |         |         |
| Arm 1 | Non-responder              | PAP    | 3200   | 6400    | 6400    |         |         |
| Arm 1 | Non-responder              | PAP    | 800    | 25600   | 51200   |         |         |
| Arm 1 | Non-responder              | PAP    | 3200   | 204800  |         |         |         |
| Arm 1 | Non-responder              | PAP    | 200    | 102400  |         |         |         |
| Arm 1 | Non-responder              | PAP    | 1600   |         |         |         |         |
| Arm 1 | Non-responder              | PAP    | 1600   |         |         |         |         |
| Arm 1 | Non-responder              | PAP    | 1600   |         |         |         |         |
| Arm 1 | Responder                  | PA2024 | 400    | 12800   | 409600  | 204800  | 800     |
| Arm 1 | Responder                  | PA2024 | 1600   | 409600  | 409600  | 50      | 102400  |
| Arm 1 | Responder                  | PA2024 | 200    | 204800  | 102400  | 204800  | 12800   |
| Arm 1 | Responder                  | PA2024 | 400    | 102400  | 204800  | 25600   |         |
| Arm 1 | Responder                  | PA2024 | 400    | 204800  |         |         |         |
| Arm 1 | Responder                  | PA2024 | 3200   | 204800  |         |         |         |
| Arm 1 | Non-responder              | PA2024 | 400    | 25600   | 51200   | 3200    |         |
| Arm 1 | Non-responder              | PA2024 | 200    | 102400  | 6400    |         |         |
| Arm 1 | Non-responder              | PA2024 | 1600   | 1600    | 3200    |         |         |
| Arm 1 | Non-responder              | PA2024 | 200    | 12800   | 51200   |         |         |
| Arm 1 | Non-responder              | PA2024 | 800    | 204800  |         |         |         |
| Arm 1 | Non-responder              | PA2024 | 400    | 102400  |         |         |         |
| Arm 1 | Non-responder              | PA2024 | 800    |         |         |         |         |
| Arm 1 | Non-responder              | PA2024 | 51200  |         |         |         |         |
| Arm 1 | Non-responder              | PA2024 | 800    |         |         |         |         |
| Arm 1 | Non-responder              | PA2024 | 400    |         |         |         |         |

| Arm   | Responder or Non-responder |        | week 0 | week 7 | week 11 | week 15 | week 27 |
|-------|----------------------------|--------|--------|--------|---------|---------|---------|
| Arm 2 | Responder                  | PAP    | 3200   | 12800  | 25600   | 12800   | 102400  |
| Arm 2 | Responder                  | PAP    | 1600   | 102400 | 204800  | 51200   | 12800   |
| Arm 2 | Responder                  | PAP    | 6400   | 51200  | 51200   | 409600  |         |
| Arm 2 | Responder                  | PAP    | 100    |        | 409600  | 51200   |         |
| Arm 2 | Non-responder              | PAP    | 1600   | 1600   | 3200    | 102400  |         |
| Arm 2 | Non-responder              | PAP    | 200    | 102400 | 51200   | 6400    |         |
| Arm 2 | Non-responder              | PAP    | 1600   | 102400 | 409600  | 12800   |         |
| Arm 2 | Non-responder              | PAP    | 6400   | 102400 | 50      | 6400    |         |
| Arm 2 | Non-responder              | PAP    | 1600   | 50     | 25600   | 102400  |         |
| Arm 2 | Non-responder              | PAP    | 1600   | 25600  | 25600   | 1600    |         |
| Arm 2 | Non-responder              | PAP    | 12800  | 204800 | 204800  |         |         |
| Arm 2 | Non-responder              | PAP    | 3200   | 204800 | 3200    |         |         |
| Arm 2 | Non-responder              | PAP    | 50     | 6400   | 409600  |         |         |
| Arm 2 | Non-responder              | PAP    | 1600   | 12800  |         |         |         |
| Arm 2 | Non-responder              | PAP    | 1600   |        |         |         |         |
| Arm 2 | Non-responder              | PAP    | 100    |        |         |         |         |
| Arm 2 | Responder                  | PA2024 | 1600   | 25600  | 25600   | 12800   | 102400  |
| Arm 2 | Responder                  | PA2024 | 3200   | 102400 | 102400  | 51200   | 6400    |
| Arm 2 | Responder                  | PA2024 | 1600   | 51200  | 51200   | 102400  |         |
| Arm 2 | Responder                  | PA2024 | 200    |        | 409600  | 12800   |         |
| Arm 2 | Non-responder              | PA2024 | 6400   | 3200   | 12800   | 12800   |         |
| Arm 2 | Non-responder              | PA2024 | 200    | 12800  | 25600   | 25600   |         |
| Arm 2 | Non-responder              | PA2024 | 800    | 102400 | 409600  | 51200   |         |
| Arm 2 | Non-responder              | PA2024 | 1600   | 204800 | 50      | 51200   |         |
| Arm 2 | Non-responder              | PA2024 | 1600   | 3200   | 51200   | 102400  |         |
| Arm 2 | Non-responder              | PA2024 | 800    | 102400 | 51200   | 25600   |         |
| Arm 2 | Non-responder              | PA2024 | 400    | 204800 | 204800  |         |         |
| Arm 2 | Non-responder              | PA2024 | 51200  | 409600 | 51200   |         |         |
| Arm 2 | Non-responder              | PA2024 | 200    | 51200  | 409600  |         |         |
| Arm 2 | Non-responder              | PA2024 | 50     | 102400 |         |         |         |
| Arm 2 | Non-responder              | PA2024 | 400    |        |         |         |         |
| Arm 2 | Non-responder              | PA2024 | 800    |        |         |         |         |
| Arm 2 | Non-responder              | PA2024 | 50     |        |         |         |         |

| Arm   | Responder or Non-responder | ELISPOT | week 0 | week 12 | week 16 | week 20 |
|-------|----------------------------|---------|--------|---------|---------|---------|
| Arm 1 | Responder                  | PAP     | 0      | 0       | 0       | 0       |
| Arm 1 | Responder                  | PAP     | 0      | 0       | 0       | 9.5     |
| Arm 1 | Responder                  | PAP     | 0      | 2       | 6       | 2       |
| Arm 1 | Responder                  | PAP     | 0      | 0.67    |         |         |
| Arm 1 | Responder                  | PAP     | 0      | 6.67    |         |         |
| Arm 1 | Responder                  | PAP     | 0      | 7.33    |         |         |
| Arm 1 | Non-responder              | PAP     | 19.33  | 0       | 0       | 7.33    |
| Arm 1 | Non-responder              | PAP     | 0      | 0.67    | 2       | 0       |
| Arm 1 | Non-responder              | PAP     | 0      | 10      | 0.33    |         |
| Arm 1 | Non-responder              | PAP     | 0      | 0       | 19      |         |
| Arm 1 | Non-responder              | PAP     | 19     | 0       |         |         |
| Arm 1 | Non-responder              | PAP     | 2      | 0       |         |         |
| Arm 1 | Non-responder              | PAP     | 0.33   |         |         |         |
| Arm 1 | Non-responder              | PAP     | 23.67  |         |         |         |
| Arm 1 | Responder                  | PA2024  | 0      | 100.67  | 92      | 41.67   |
| Arm 1 | Responder                  | PA2024  | 0      | 55.33   | 76      | 357     |
| Arm 1 | Responder                  | PA2024  | 0      | 28      | 30.67   | 37.33   |
| Arm 1 | Responder                  | PA2024  | 0.67   | 8.33    |         |         |
| Arm 1 | Responder                  | PA2024  | 0      | 131.33  |         |         |
| Arm 1 | Responder                  | PA2024  | 0      | 191.33  |         |         |
| Arm 1 | Non-responder              | PA2024  | 14     | 69      | 19.67   | 54      |
| Arm 1 | Non-responder              | PA2024  | 0      | 146.67  | 19      | 73      |
| Arm 1 | Non-responder              | PA2024  | 0      | 109.67  | 193     |         |
| Arm 1 | Non-responder              | PA2024  | 0      | 13      | 196     |         |
| Arm 1 | Non-responder              | PA2024  | 12     | 47      |         |         |
| Arm 1 | Non-responder              | PA2024  | 1.67   | 1.33    |         |         |
| Arm 1 | Non-responder              | PA2024  | 0      |         |         |         |
| Arm 1 | Non-responder              | PA2024  | 5.33   |         |         |         |

week 32

0

1

53.33

107

| Arm   | Responder or Non-responder | ELISPOT | week 0 | week 7 | week 11 | week 15 |
|-------|----------------------------|---------|--------|--------|---------|---------|
| Arm 2 | Responder                  | PAP     | 0      | 0      | 0       | 2.67    |
| Arm 2 | Responder                  | PAP     | 2.67   | 0      | 4       | 1.67    |
| Arm 2 | Responder                  | PAP     | 0      | 0      | 0       | 0       |
| Arm 2 | Responder                  | PAP     | 22.33  | 3.33   | 0       |         |
| Arm 2 | Non-responder              | PAP     | 0      | 0      | 0.33    | 16      |
| Arm 2 | Non-responder              | PAP     | 0.67   | 139.33 | 0       | 1.67    |
| Arm 2 | Non-responder              | PAP     | 6.33   | 0      | 74.33   | 0       |
| Arm 2 | Non-responder              | PAP     | 0.67   | 20.67  | 0.33    | 6.33    |
| Arm 2 | Non-responder              | PAP     | 0      | 18     | 0.33    | 0       |
| Arm 2 | Non-responder              | PAP     | 0      | 0      | 0       | 21.33   |
| Arm 2 | Non-responder              | PAP     | 2      | 0      | 9.67    | 33.67   |
| Arm 2 | Non-responder              | PAP     | 0      | 4.33   | 2.33    |         |
| Arm 2 | Non-responder              | PAP     | 19.33  | 5.67   |         |         |
| Arm 2 | Non-responder              | PAP     | 1      | 0      |         |         |
| Arm 2 | Non-responder              | PAP     | 0      | 71.33  |         |         |
| Arm 2 | Non-responder              | PAP     | 0      | 0      |         |         |
| Arm 2 | Non-responder              | PAP     | 0      |        |         |         |
| Arm 2 | Non-responder              | PAP     | 0      |        |         |         |
| Arm 2 | Responder                  | PA2024  | 0      | 2      | 14.67   | 26.33   |
| Arm 2 | Responder                  | PA2024  | 0.67   | 3.33   | 27.33   | 18.67   |
| Arm 2 | Responder                  | PA2024  | 1      | 125.67 | 37.33   | 47.67   |
| Arm 2 | Responder                  | PA2024  | 87     | 52     | 12      |         |
| Arm 2 | Non-responder              | PA2024  | 0.33   | 74.67  | 10      | 161.33  |
| Arm 2 | Non-responder              | PA2024  | 0      | 126.33 | 118     | 144.67  |
| Arm 2 | Non-responder              | PA2024  | 1      | 3.67   | 167     | 9.33    |
| Arm 2 | Non-responder              | PA2024  | 0.33   | 261.67 | 12.67   | 40.33   |
| Arm 2 | Non-responder              | PA2024  | 0.33   | 213.67 | 3.67    | 3.67    |
| Arm 2 | Non-responder              | PA2024  | 0      | 196.67 | 8.67    | 23.67   |
| Arm 2 | Non-responder              | PA2024  | 2.67   | 23     | 19      | 27.33   |
| Arm 2 | Non-responder              | PA2024  | 1.33   | 110.67 | 15.67   |         |
| Arm 2 | Non-responder              | PA2024  | 7.67   | 103    |         |         |
| Arm 2 | Non-responder              | PA2024  | 0.33   | 86     |         |         |
| Arm 2 | Non-responder              | PA2024  | 0      | 110    |         |         |
| Arm 2 | Non-responder              | PA2024  | 0      | 51.67  |         |         |
| Arm 2 | Non-responder              | PA2024  | 1.67   |        |         |         |
| Arm 2 | Non-responder              | PA2024  | 0      |        |         |         |

week 27

0

0

8

25.67

| Arm   | Response      | Stimulation Index | week 0 | week 12 | week 16 | week 20 |
|-------|---------------|-------------------|--------|---------|---------|---------|
| Arm 1 | Responder     | PAP               | 0.74   | 1.14    | 0.68    | 0.74    |
| Arm 1 | Responder     | PAP               | 0.97   | 0.67    | 0.81    | 0.49    |
| Arm 1 | Responder     | PAP               | 0.7    | 0.59    | 2.23    | 1.87    |
| Arm 1 | Responder     | PAP               | 0.59   | 0.39    |         |         |
| Arm 1 | Responder     | PAP               | 1.67   | 0.42    |         |         |
| Arm 1 | Responder     | PAP               |        | 2.45    |         |         |
| Arm 1 | Non-responder | PAP               | 1.25   | 0.69    | 0.48    | 1.41    |
| Arm 1 | Non-responder | PAP               | 0.59   | 0.65    | 0.38    |         |
| Arm 1 | Non-responder | PAP               | 0.85   | 1.9     | 7.54    |         |
| Arm 1 | Non-responder | PAP               | 1.65   | 0.43    |         |         |
| Arm 1 | Non-responder | PAP               | 0.21   | 1.41    |         |         |
| Arm 1 | Non-responder | PAP               | 1.36   | 0.67    |         |         |
| Arm 1 | Non-responder | PAP               | 0.59   |         |         |         |
| Arm 1 | Non-responder | PAP               | 0.73   |         |         |         |
| Arm 1 | Responder     | PA2024            | 1.04   | 10.28   | 7.16    | 5.29    |
| Arm 1 | Responder     | PA2024            | 0.93   | 6.23    | 17.4    | 11.13   |
| Arm 1 | Responder     | PA2024            | 1.22   | 16.51   | 56.51   | 58.4    |
| Arm 1 | Responder     | PA2024            | 0.66   | 5.92    |         |         |
| Arm 1 | Responder     | PA2024            | 3.14   | 8.7     |         |         |
| Arm 1 | Responder     | PA2024            |        | 60.57   |         |         |
| Arm 1 | Non-responder | PA2024            | 2.09   | 75.97   | 29.04   | 14.14   |
| Arm 1 | Non-responder | PA2024            | 0.9    | 20.12   | 18.08   |         |
| Arm 1 | Non-responder | PA2024            | 1.07   | 16.87   | 56.52   |         |
| Arm 1 | Non-responder | PA2024            | 1.88   | 2.8     |         |         |
| Arm 1 | Non-responder | PA2024            | 0.44   | 55.01   |         |         |
| Arm 1 | Non-responder | PA2024            | 2.77   | 31.09   |         |         |
| Arm 1 | Non-responder | PA2024            | 0.87   |         |         |         |
| Arm 1 | Non-responder | PA2024            | 1.1    |         |         |         |

week 32  
2.17

18.88



| Arm   | Response      | Stimulation Index | week 0 | week 7 | week 11 | week 15 |
|-------|---------------|-------------------|--------|--------|---------|---------|
| Arm 2 | Responder     | PAP               | 1.6    | 1.16   | 1.27    | 2.02    |
| Arm 2 | Responder     | PAP               | 1.07   | 0.97   | 3.75    | 0.66    |
| Arm 2 | Responder     | PAP               | 0.76   | 0.44   | 1.02    | 0.96    |
| Arm 2 | Responder     | PAP               | 0.95   |        | 0.48    |         |
| Arm 2 | Non-responder | PAP               | 0.5    | 0.43   | 0.76    | 5.38    |
| Arm 2 | Non-responder | PAP               | 0.76   | 6.15   | 1.04    | 1.01    |
| Arm 2 | Non-responder | PAP               | 0.92   | 1.87   | 8.29    | 0.73    |
| Arm 2 | Non-responder | PAP               | 0.89   | 0.08   | 0.76    | 3.63    |
| Arm 2 | Non-responder | PAP               | 0.88   | 0.44   | 0.89    | 4.03    |
| Arm 2 | Non-responder | PAP               | 0.98   | 0.91   | 0.89    | 0.72    |
| Arm 2 | Non-responder | PAP               | 1.02   | 1.44   | 7.46    |         |
| Arm 2 | Non-responder | PAP               | 1.72   | 2.08   | 1.12    |         |
| Arm 2 | Non-responder | PAP               | 1.01   | 7.02   | 8.29    |         |
| Arm 2 | Non-responder | PAP               | 0.9    | 1.18   |         |         |
| Arm 2 | Non-responder | PAP               | 0.98   | 0.91   |         |         |
| Arm 2 | Responder     | PA2024            | 1.34   | 18.23  | 33.72   | 82.08   |
| Arm 2 | Responder     | PA2024            | 1.48   | 41.62  | 14.62   | 2.12    |
| Arm 2 | Responder     | PA2024            | 1.3    | 13.33  | 29.94   | 24.31   |
| Arm 2 | Responder     | PA2024            | 1.82   |        | 9.67    |         |
| Arm 2 | Non-responder | PA2024            | 1.77   | 29.65  | 15.25   | 10.62   |
| Arm 2 | Non-responder | PA2024            | 0.97   | 12.17  | 3.18    | 9.06    |
| Arm 2 | Non-responder | PA2024            | 0.85   | 24.58  | 22.1    | 19.86   |
| Arm 2 | Non-responder | PA2024            | 2.39   | 9.78   | 16.39   | 10.92   |
| Arm 2 | Non-responder | PA2024            | 1.33   | 2.54   | 8.27    | 9.46    |
| Arm 2 | Non-responder | PA2024            | 1.37   | 9      | 11.03   | 1.82    |
| Arm 2 | Non-responder | PA2024            | 0.88   | 43.37  | 12.43   |         |
| Arm 2 | Non-responder | PA2024            | 1.54   | 8.37   | 3.03    |         |
| Arm 2 | Non-responder | PA2024            | 1.18   | 13.29  | 22.1    |         |
| Arm 2 | Non-responder | PA2024            | 0.96   | 3.11   |         |         |
| Arm 2 | Non-responder | PA2024            | 1.3    | 9      |         |         |

week 27

0.84

0.87

10.95

14.2
