# Supplementary material for: Phase Ib study of patients with metastatic castrate-resistant prostate cancer treated with different sequencing regimens of atezolizumab and sipuleucel-T
Source: PubMed Central journal article supplement — J Immunother Cancer. 2021 Aug 10;9(8):e002931. doi: 10.1136/jitc-2021-002931 (PMC8356194; doi:10.1136/jitc-2021-002931), 2021-08-10
Supplement: jitc-2021-002931supp003.pdf [file jitc-2021-002931supp003.pdf]

**Table S2. Antigens with outlier signals among 6-month responders vs. non-responders at baseline.** Ninety-two antigens were identified using PIWAS comparing baseline samples of 6-month responders (n = 10) vs. non-responders (n = 19), with an outlier sum false discovery rate < 0.05 and *p*-value < 0.05 by Mann-Whitney U test. These antigens were annotated with cancer testis antigens (30), secretome (31), surfaceome (32), tissue expression in the prostate (31), immune proteins (33-35) including cytokines, chemokines, and other immune molecules, and tumor suppressors and oncogenes (36).

| OutlierSum_P_FDR | MW_Pvalue | CancerTestisAntigen | Membrane_or_secreted | Surface_protein   | Tissue_expression                       | Immune_protein | Tumor_suppressor | Oncogene |
|------------------|-----------|---------------------|----------------------|-------------------|-----------------------------------------|----------------|------------------|----------|
| 0.03             | 0         | No                  | Intracellular        | Not_Surface       | Expressed_in_prostate_elevated_in_other | No             | No               | No       |
| 3.56E-07         | 0         | No                  | Intracellular        | Not_Surface       | Expressed_w_low_specificity             | No             | No               | No       |
| 0                | 0         | No                  | Secreted_only        | Not_Surface       | Not_expressed_in_prostate               | No             | No               | No       |
| 0                | 0         | No                  | Membrane_only        | Not_Surface       | Expressed_w_low_specificity             | No             | No               | No       |
| 0.01             | 0         | No                  | Membrane_only        | Surface_Receptors | Not_expressed_in_prostate               | No             | No               | No       |
| 0                | 0         | No                  | Intracellular        | Not_Surface       | Expressed_w_low_specificity             | No             | No               | No       |
| 0.04             | 0         | No                  | Intracellular        | Not_Surface       | Not_expressed_in_prostate               | No             | No               | No       |
| 5.36E-07         | 0         | No                  | Intracellular        | Not_Surface       | Expressed_w_low_specificity             | No             | No               | No       |
| 0.02             | 0         | No                  | Intracellular        | Not_Surface       | Expressed_in_prostate_elevated_in_other | No             | No               | No       |
| 0.02             | 0         | No                  | Intracellular        | Not_Surface       | Expressed_w_low_specificity             | No             | No               | No       |
| 0.02             | 0         | No                  | Intracellular        | Not_Surface       | Expressed_w_low_specificity             | No             | No               | No       |

|          |      |    |               |                      |                                         |    |    |    |
|----------|------|----|---------------|----------------------|-----------------------------------------|----|----|----|
| 0.04     | 0    | No | Not_Annotated | Not_Surface          | Not_annotated                           | No | No | No |
| 0        | 0    | No | Intracellular | Not_Surface          | Not_expressed_in_prostate               | No | No | No |
| 0.03     | 0    | No | Secreted_only | Not_Surface          | Not_expressed_in_prostate               | No | No | No |
| 0.03     | 0    | No | Intracellular | Not_Surface          | Expressed_in_prostate_elevated_in_other | No | No | No |
| 0.04     | 0    | No | Membrane_only | Surface_Receptors    | Not_expressed_in_prostate               | No | No | No |
| 0.05     | 0    | No | Intracellular | Not_Surface          | Expressed_w_low_specificity             | No | No | No |
| 0.04     | 0    | No | Secreted_only | Not_Surface          | Not_expressed_in_prostate               | No | No | No |
| 0.01     | 0    | No | Intracellular | Not_Surface          | Expressed_w_low_specificity             | No | No | No |
| 0.02     | 0    | No | Membrane_only | Not_Surface          | Expressed_w_low_specificity             | No | No | No |
| 0.03     | 0    | No | Membrane_only | Not_Surface          | Not_expressed_in_prostate               | No | No | No |
| 0.02     | 0    | No | Not_Annotated | Not_Surface          | Not_annotated                           | No | No | No |
| 0        | 0.01 | No | Membrane_only | Surface_Enzymes      | Not_expressed_in_prostate               | No | No | No |
| 0        | 0.01 | No | Membrane_only | Not_Surface          | Expressed_in_prostate_elevated_in_other | No | No | No |
| 0.01     | 0.01 | No | Intracellular | Not_Surface          | Expressed_in_prostate_elevated_in_other | No | No | No |
| 0.01     | 0.01 | No | Intracellular | Not_Surface          | Expressed_in_prostate_elevated_in_other | No | No | No |
| 0.02     | 0.01 | No | Intracellular | Not_Surface          | Not_expressed_in_prostate               | No | No | No |
| 0.03     | 0.01 | No | Membrane_only | Not_Surface          | Expressed_w_low_specificity             | No | No | No |
| 4.48E-07 | 0.01 | No | Membrane_only | Not_Surface          | Expressed_w_low_specificity             | No | No | No |
| 0.01     | 0.01 | No | Membrane_only | Surface_Unclassified | Expressed_w_low_specificity             | No | No | No |

|          |      |    |               |                   |                                         |     |    |     |
|----------|------|----|---------------|-------------------|-----------------------------------------|-----|----|-----|
| 0.02     | 0.01 | No | Intracellular | Not_Surface       | Expressed_in_prostate_elevated_in_other | No  | No | No  |
| 0.02     | 0.01 | No | Not_Annotated | Not_Surface       | Not_annotated                           | No  | No | No  |
| 0.03     | 0.01 | No | Membrane_only | Surface_Enzymes   | Expressed_in_prostate_elevated_in_other | No  | No | No  |
| 0.05     | 0.01 | No | Intracellular | Not_Surface       | Expressed_in_prostate_elevated_in_other | No  | No | Yes |
| 0        | 0.01 | No | Secreted_only | Not_Surface       | Not_expressed_in_prostate               | No  | No | No  |
| 0.01     | 0.01 | No | Membrane_only | Surface_Receptors | Expressed_w_low_specificity             | No  | No | No  |
| 0.02     | 0.01 | No | Intracellular | Not_Surface       | Expressed_w_low_specificity             | No  | No | No  |
| 0.03     | 0.01 | No | Intracellular | Not_Surface       | Expressed_w_low_specificity             | No  | No | Yes |
| 0.01     | 0.01 | No | Intracellular | Not_Surface       | Expressed_w_low_specificity             | No  | No | No  |
| 0.01     | 0.01 | No | Not_Annotated | Not_Surface       | Not_annotated                           | No  | No | No  |
| 0.01     | 0.01 | No | Intracellular | Not_Surface       | Expressed_w_low_specificity             | No  | No | No  |
| 0.02     | 0.01 | No | Secreted_only | Not_Surface       | Not_expressed_in_prostate               | Yes | No | No  |
| 0.03     | 0.01 | No | Intracellular | Not_Surface       | Expressed_w_low_specificity             | No  | No | No  |
| 0        | 0.01 | No | Intracellular | Not_Surface       | Expressed_w_low_specificity             | No  | No | No  |
| 0.02     | 0.01 | No | Membrane_only | Surface_Receptors | Not_expressed_in_any_tissue             | No  | No | No  |
| 0.03     | 0.01 | No | Not_Annotated | Not_Surface       | Not_annotated                           | No  | No | No  |
| 0.04     | 0.01 | No | Membrane_only | Not_Surface       | Not_expressed_in_prostate               | No  | No | No  |
| 0.04     | 0.01 | No | Intracellular | Not_Surface       | Expressed_w_low_specificity             | No  | No | No  |
| 0.05     | 0.01 | No | Intracellular | Not_Surface       | Expressed_w_low_specificity             | No  | No | No  |
| 3.56E-07 | 0.01 | No | Intracellular | Not_Surface       | Not_expressed_in_prostate               | No  | No | No  |

|      |      |     |               |                   |                                         |     |    |     |
|------|------|-----|---------------|-------------------|-----------------------------------------|-----|----|-----|
| 0.02 | 0.01 | No  | Intracellular | Not_Surface       | Expressed_w_low_specificity             | No  | No | No  |
| 0    | 0.01 | No  | Intracellular | Not_Surface       | Expressed_w_low_specificity             | No  | No | No  |
| 0    | 0.01 | No  | Intracellular | Not_Surface       | Expressed_in_prostate_elevated_in_other | No  | No | No  |
| 0.01 | 0.01 | No  | Membrane_only | Surface_Receptors | Expressed_w_low_specificity             | No  | No | Yes |
| 0.02 | 0.01 | No  | Intracellular | Not_Surface       | Expressed_w_low_specificity             | No  | No | No  |
| 0.04 | 0.01 | No  | Intracellular | Not_Surface       | Expressed_in_prostate_elevated_in_other | No  | No | No  |
| 0    | 0.01 | No  | Membrane_only | Not_Surface       | Expressed_in_prostate_elevated_in_other | No  | No | No  |
| 0    | 0.01 | No  | Intracellular | Not_Surface       | Expressed_w_low_specificity             | No  | No | No  |
| 0    | 0.01 | No  | Intracellular | Not_Surface       | Expressed_w_low_specificity             | No  | No | No  |
| 0.01 | 0.01 | No  | Membrane_only | Not_Surface       | Not_expressed_in_prostate               | No  | No | No  |
| 0.01 | 0.01 | No  | Secreted_only | Not_Surface       | Expressed_in_prostate_elevated_in_other | No  | No | No  |
| 0.04 | 0.01 | No  | Intracellular | Not_Surface       | Expressed_w_low_specificity             | No  | No | No  |
| 0.02 | 0.02 | No  | Intracellular | Not_Surface       | Expressed_in_prostate_elevated_in_other | No  | No | No  |
| 0.02 | 0.02 | Yes | Membrane_only | Surface_Enzymes   | Not_expressed_in_prostate               | No  | No | No  |
| 0.02 | 0.02 | No  | Membrane_only | Not_Surface       | Expressed_in_prostate_elevated_in_other | No  | No | No  |
| 0    | 0.02 | No  | Intracellular | Not_Surface       | Not_expressed_in_prostate               | No  | No | No  |
| 0    | 0.02 | No  | Not_Annotated | Not_Surface       | Not_annotated                           | No  | No | No  |
| 0.04 | 0.02 | No  | Secreted_only | Not_Surface       | Not_expressed_in_prostate               | Yes | No | No  |

|      |      |    |               |                       |                                         |    |     |     |
|------|------|----|---------------|-----------------------|-----------------------------------------|----|-----|-----|
| 0    | 0.02 | No | Intracellular | Not_Surface           | Expressed_w_low_specificity             | No | No  | No  |
| 0.03 | 0.02 | No | Intracellular | Not_Surface           | Not_expressed_in_prostate               | No | No  | No  |
| 0.04 | 0.02 | No | Intracellular | Not_Surface           | Not_expressed_in_prostate               | No | No  | No  |
| 0.01 | 0.02 | No | Intracellular | Not_Surface           | Expressed_w_low_specificity             | No | No  | No  |
| 0.02 | 0.02 | No | Intracellular | Not_Surface           | Expressed_in_prostate_elevated_in_other | No | No  | No  |
| 0.03 | 0.02 | No | Intracellular | Not_Surface           | Expressed_w_low_specificity             | No | No  | No  |
| 0.01 | 0.03 | No | Intracellular | Not_Surface           | Expressed_in_prostate_elevated_in_other | No | No  | No  |
| 0    | 0.03 | No | Intracellular | Not_Surface           | Expressed_in_prostate_elevated_in_other | No | No  | No  |
| 0.03 | 0.03 | No | Secreted_only | Not_Surface           | Expressed_in_prostate_elevated_in_other | No | No  | No  |
| 0    | 0.03 | No | Not_Annotated | Surface_Receptors     | Not_annotated                           | No | No  | No  |
| 0.01 | 0.03 | No | Intracellular | Not_Surface           | Not_expressed_in_prostate               | No | Yes | Yes |
| 0.01 | 0.03 | No | Intracellular | Not_Surface           | Expressed_in_prostate_elevated_in_other | No | No  | No  |
| 0    | 0.04 | No | Intracellular | Not_Surface           | Expressed_w_low_specificity             | No | No  | No  |
| 0.01 | 0.04 | No | Membrane_only | Surface_Miscellaneous | Not_expressed_in_prostate               | No | No  | No  |
| 0.01 | 0.04 | No | Not_Annotated | Not_Surface           | Not_annotated                           | No | No  | No  |
| 0.02 | 0.04 | No | Membrane_only | Not_Surface           | Expressed_in_prostate_elevated_in_other | No | No  | No  |
| 0.02 | 0.04 | No | Not_Annotated | Not_Surface           | Not_annotated                           | No | No  | No  |
| 0.02 | 0.04 | No | Secreted_only | Not_Surface           | Not_expressed_in_prostate               | No | No  | No  |

|          |      |    |               |                   |                                         |    |    |    |
|----------|------|----|---------------|-------------------|-----------------------------------------|----|----|----|
| 7.58E-12 | 0.04 | No | Intracellular | Not_Surface       | Expressed_in_prostate_elevated_in_other | No | No | No |
| 0.03     | 0.04 | No | Intracellular | Not_Surface       | Expressed_in_prostate_elevated_in_other | No | No | No |
| 0.04     | 0.04 | No | Intracellular | Not_Surface       | Expressed_w_low_specificity             | No | No | No |
| 0        | 0.05 | No | Membrane_only | Surface_Enzymes   | Expressed_w_low_specificity             | No | No | No |
| 0.05     | 0.05 | No | Membrane_only | Surface_Receptors | Expressed_w_low_specificity             | No | No | No |
| 0.05     | 0.05 | No | Intracellular | Not_Surface       | Expressed_w_low_specificity             | No | No | No |
