# Supplementary material for: Phase Ib study of patients with metastatic castrate-resistant prostate cancer treated with different sequencing regimens of atezolizumab and sipuleucel-T
Source: PubMed Central journal article supplement — J Immunother Cancer. 2021 Aug 10;9(8):e002931. doi: 10.1136/jitc-2021-002931 (PMC8356194; doi:10.1136/jitc-2021-002931), 2021-08-10
Supplement: jitc-2021-002931supp004.pdf [file jitc-2021-002931supp004.pdf]

**Table S3. Shared antigens with increased signal in response to Sipuleucel-T.** Antigens with significant signal increase were identified by serial sample PIWAS analysis between samples at baseline and week 7 for each subject from Arm 2 on Sipuleucel-T and before atezolizumab introduction. Forty antigens with significantly increased signals were shared by at least two subjects.

| Accession | Protein_name                                                 | Gene_symbol | Membrane_or_secreted | Tissue_expression                       |
|-----------|--------------------------------------------------------------|-------------|----------------------|-----------------------------------------|
| A0AVI2    | Fer-1-like protein 5                                         | FER1L5      | Membrane_only        | Expressed_in_prostate_elevated_in_other |
| O00481    | Butyrophilin subfamily 3 member A1                           | BTN3A1      | Membrane_only        | Expressed_w_low_specificity             |
| O43298    | Zinc finger and BTB domain-containing protein 43             | ZBTB43      | Intracellular        | Expressed_in_prostate_elevated_in_other |
| O60303    | Protein KIAA0556                                             | KIAA0556    | Intracellular        | Expressed_w_low_specificity             |
| O60341    | Lysine-specific histone demethylase 1A                       | KDM1A       | Intracellular        | Expressed_w_low_specificity             |
| O75106    | Retina-specific copper amine oxidase                         | AOC2        | Intracellular        | Expressed_in_prostate_elevated_in_other |
| O75592    | E3 ubiquitin-protein ligase MYCBP2                           | MYCBP2      | Intracellular        | Expressed_w_low_specificity             |
| O76039    | Cyclin-dependent kinase-like 5                               | CDKL5       | Intracellular        | Expressed_in_prostate_elevated_in_other |
| O95714    | E3 ubiquitin-protein ligase HERC2                            | HERC2       | Membrane_only        | Expressed_w_low_specificity             |
| P02750    | Leucine-rich alpha-2-glycoprotein                            | LRG1        | Secreted_only        | Expressed_in_prostate_elevated_in_other |
| P48039    | Melatonin receptor type 1A                                   | MTNR1A      | Membrane_only        | Not_expressed_in_prostate               |
| P59103    | D-amino acid oxidase activator                               | DAOA        | Intracellular        | Not_expressed_in_any_tissue             |
| P98095    | Fibulin-2                                                    | FBLN2       | Secreted_only        | Expressed_in_prostate_elevated_in_other |
| Q00587    | Cdc42 effector protein 1                                     | CDC42EP1    | Intracellular        | Expressed_w_low_specificity             |
| Q01973    | Inactive tyrosine-protein kinase transmembrane receptor ROR1 | ROR1        | Membrane_only        | Expressed_in_prostate_elevated_in_other |
| Q13342    | Nuclear body protein SP140                                   | SP140       | Intracellular        | Expressed_in_prostate_elevated_in_other |

|        |                                                                     |         |               |                                         |
|--------|---------------------------------------------------------------------|---------|---------------|-----------------------------------------|
| Q13523 | Serine/threonine-protein kinase PRP4 homolog                        | PRPF4B  | Intracellular | Expressed_w_low_specificity             |
| Q5JS13 | Ras-specific guanine nucleotide-releasing factor RalGPS1            | RALGPS1 | Intracellular | Expressed_w_low_specificity             |
| Q5T5Y3 | Calmodulin-regulated spectrin-associated protein 1                  | CAMSAP1 | Intracellular | Expressed_w_low_specificity             |
| Q5UE93 | Phosphoinositide 3-kinase regulatory subunit 6                      | PIK3R6  | Intracellular | Expressed_in_prostate_elevated_in_other |
| Q5VTQ0 | Tetratricopeptide repeat protein 39B                                | TTC39B  | Membrane_only | Expressed_in_prostate_elevated_in_other |
| Q5VU43 | Myomegalin                                                          | PDE4DIP | Intracellular | Expressed_in_prostate_elevated_in_other |
| Q68CZ2 | Tensin-3                                                            | TNS3    | Intracellular | Expressed_w_low_specificity             |
| Q6V0I7 | Protocadherin Fat 4                                                 | FAT4    | Membrane_only | Expressed_w_low_specificity             |
| Q6ZP82 | Coiled-coil domain-containing protein 141                           | CCDC141 | Membrane_only | Expressed_in_prostate_elevated_in_other |
| Q7KZI7 | Serine/threonine-protein kinase MARK2                               | MARK2   | Intracellular | Expressed_w_low_specificity             |
| Q86UK5 | Limbin                                                              | EVC2    | Membrane_only | Expressed_w_low_specificity             |
| Q8IWX7 | Protein unc-45 homolog B                                            | UNC45B  | Intracellular | Not_expressed_in_prostate               |
| Q8TDY2 | RB1-inducible coiled-coil protein 1                                 | RB1CC1  | Intracellular | Expressed_w_low_specificity             |
| Q9HBF4 | Zinc finger FYVE domain-containing protein 1                        | ZFYVE1  | Intracellular | Expressed_w_low_specificity             |
| Q9NPC6 | Myozenin-2                                                          | MYOZ2   | Intracellular | Not_expressed_in_prostate               |
| Q9P212 | 1-phosphatidylinositol 4,5-bisphosphate phosphodiesterase epsilon-1 | PLCE1   | Intracellular | Expressed_in_prostate_elevated_in_other |
| Q9UBW7 | Zinc finger MYM-type protein 2                                      | ZMYM2   | Intracellular | Expressed_w_low_specificity             |
| Q9ULC6 | Protein-arginine deiminase type-1                                   | PADI1   | Intracellular | Not_expressed_in_prostate               |
| Q9UQK1 | Protein phosphatase 1 regulatory subunit 3C                         | PPP1R3C | Intracellular | Expressed_in_prostate_elevated_in_other |
| Q9Y210 | Short transient receptor potential channel 6                        | TRPC6   | Membrane_only | Expressed_in_prostate_elevated_in_other |

|        |                                        |         |               |                                         |
|--------|----------------------------------------|---------|---------------|-----------------------------------------|
| Q9Y2K2 | Serine/threonine-protein kinase SIK3   | SIK3    | Membrane_only | Expressed_w_low_specificity             |
| Q9Y5A9 | YTH domain-containing family protein 2 | YTHDF2  | Intracellular | Expressed_w_low_specificity             |
| Q9Y5I0 | Protocadherin alpha-13                 | PCDHA13 | Membrane_only | Not_expressed_in_prostate               |
| Q9Y6X6 | Unconventional myosin-XVI              | MYO16   | Intracellular | Expressed_in_prostate_elevated_in_other |
