# Supplementary material for: Phase Ib study of patients with metastatic castrate-resistant prostate cancer treated with different sequencing regimens of atezolizumab and sipuleucel-T
Source: PubMed Central journal article supplement — J Immunother Cancer. 2021 Aug 10;9(8):e002931. doi: 10.1136/jitc-2021-002931 (PMC8356194; doi:10.1136/jitc-2021-002931), 2021-08-10
Supplement: jitc-2021-002931supp005.pdf [file jitc-2021-002931supp005.pdf]

**Table S4. Shared antigens with increased signals among 6-month responders.** Antigens with significant signal increase were identified by serial sample PIWAS analysis between responder samples at baseline and week 12 for each subject. Eighteen antigens were shared by at least two 6-month responders.

| Protein name                             | Gene symbol | Membrane/<br>secreted | Tissue expression                       | Shared by                                  | ARM |
|------------------------------------------|-------------|-----------------------|-----------------------------------------|--------------------------------------------|-----|
| Protein unc-13 homolog B                 | UNC13B      | Intracellular         | Expressed_w_low_specificity             | R154-03-025, R154-03-019,<br>(R154-01-002) | 2   |
| Lysine-specific histone demethylase 1A   | KDM1A       | Intracellular         | Expressed_w_low_specificity             | R154-03-019, R154-01-017                   | 2   |
| F-box only protein 21                    | FBXO21      | Intracellular         | Expressed_in_prostate_elevated_in_other | R154-01-003, R154-03-019,<br>(R154-01-010) | 1,2 |
| Elongator complex protein 1              | ELP1        | Intracellular         | Expressed_w_low_specificity             | R154-01-003, R154-03-021                   | 1   |
| von Willebrand factor                    | VWF         | Secreted_only         | Expressed_in_prostate_elevated_in_other | R154-03-029, R154-01-017                   | 1,2 |
| Filaggrin                                | FLG         | Intracellular         | Not_expressed_in_prostate               | R154-03-025, R154-03-019                   | 2   |
| Neurofibromin                            | NF1         | Membrane_only         | Expressed_w_low_specificity             | R154-03-025, R154-03-012,<br>(R154-01-037) | 1,2 |
| Coiled-coil domain-containing protein 15 | CCDC15      | Intracellular         | Expressed_in_prostate_elevated_in_other | R154-03-025, R154-03-029                   | 1,2 |
| Laminin subunit gamma-2                  | LAMC2       | Secreted_only         | Expressed_w_low_specificity             | R154-03-029, R154-03-022                   | 1   |
| Rho GTPase-activating protein 21         | ARHGAP21    | Intracellular         | Expressed_in_prostate_elevated_in_other | R154-01-003, R154-01-017                   | 1,2 |

|                                                |         |               |                                         |                                         |     |
|------------------------------------------------|---------|---------------|-----------------------------------------|-----------------------------------------|-----|
| Phosphoinositide 3-kinase regulatory subunit 6 | PIK3R6  | Intracellular | Expressed_in_prostate_elevated_in_other | R154-01-003, R154-01-017, (R154-01-034) | 1,2 |
| Exonuclease mut-7 homolog                      | EXD3    | Intracellular | Expressed_w_low_specificity             | R154-01-003, R154-03-019                | 1,2 |
| Phosphatidate phosphatase LPIN2                | LPIN2   | Intracellular | Expressed_in_prostate_elevated_in_other | R154-01-003, R154-03-022                | 1   |
| Gamma-tubulin complex component 3              | TUBGCP3 | Intracellular | Expressed_w_low_specificity             | R154-01-003, R154-03-019                | 1,2 |
| ATP-binding cassette sub-family C member 11    | ABCC11  | Membrane_only | Expressed_in_prostate_elevated_in_other | R154-01-003, R154-03-021                | 1   |
| E3 ubiquitin-protein ligase TRIM56             | TRIM56  | Intracellular | Expressed_w_low_specificity             | R154-01-003, R154-03-029                | 1   |
| Disrupted in schizophrenia 1 protein           | DISC1   | Intracellular | Expressed_w_low_specificity             | R154-01-003, R154-03-019                | 1,2 |
| Serine/threonine-protein kinase SIK3           | SIK3    | Membrane_only | Expressed_w_low_specificity             | R154-03-025, R154-03-022                | 1,2 |
